# Supplementary material for: Autoinducer 2-Dependent Escherichia coli Biofilm Formation Is Enhanced in a Dual-Species Coculture
Source: PubMed Central journal article supplement (PMC5812939; doi:10.1128/aem.02638-17), 2018-02-14
Supplement: AEM.02638-17_zam005188341s1.pdf [file AEM.02638-17_zam005188341s1.pdf]

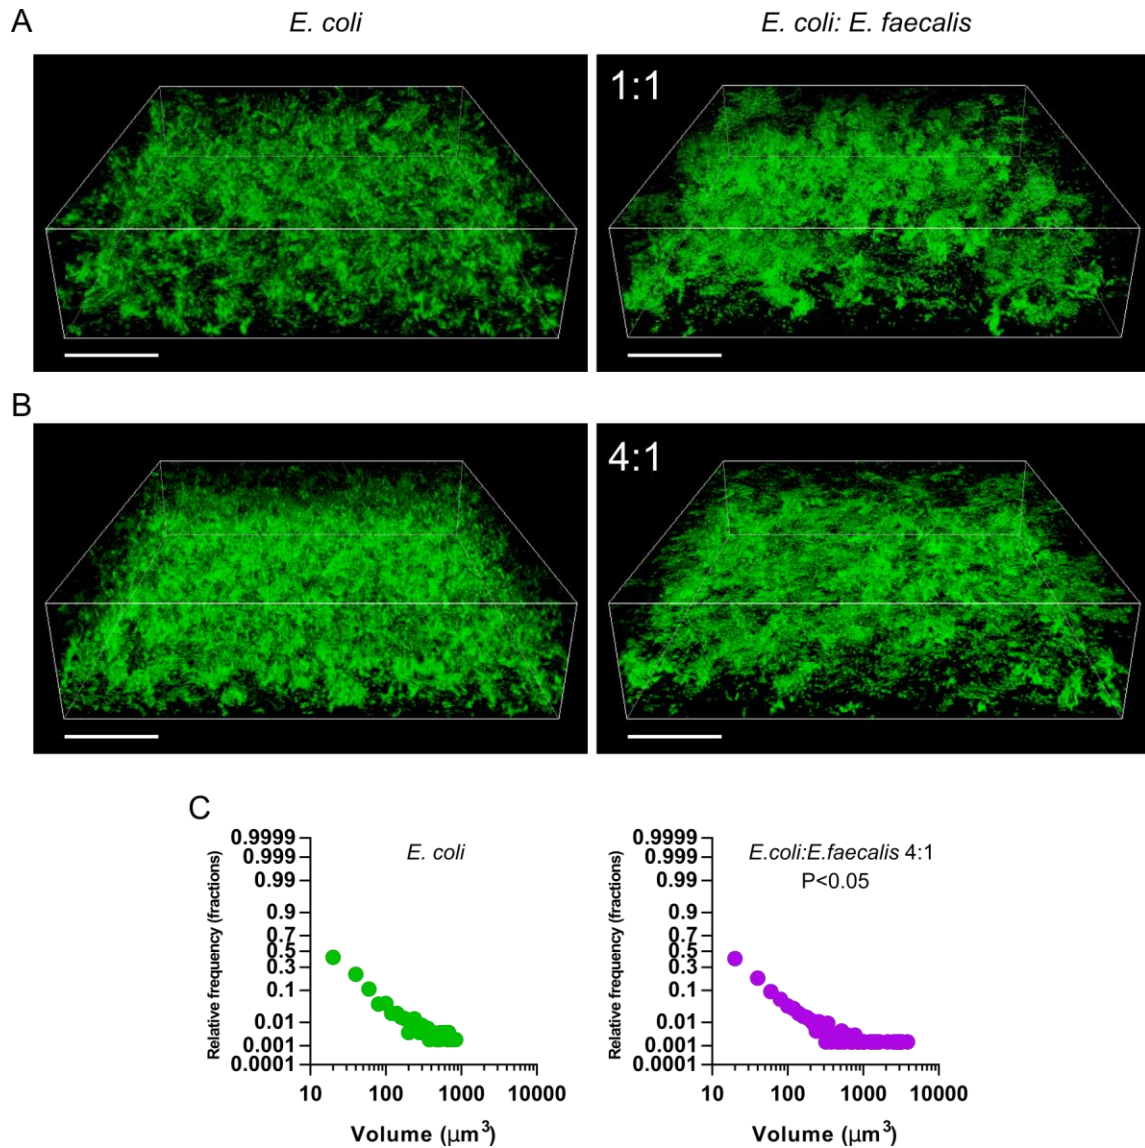

1  
2 **Figure S1. Static biofilms of *E. coli* in single- or dual-species culture.** (A) Confocal laser  
3 scanning microscopy of static *E. coli* (GFP<sup>+</sup>) biofilms grown in monoculture (left panel) or  
4 mixed with *E. faecalis* (right panel). Inoculation ratio was 1:1. Scale bars, 40 μm. (B) Confocal  
5 laser scanning microscopy of static *E. coli* (expressing GFP) biofilms grown in monoculture (left  
6 panel) or mixed with unlabeled *E. faecalis* (right panel). Inoculation ratio was 4:1. Scale bars, 40  
7 μm. (C) Distribution of microcolony volumes in the biofilms. *P* value for the difference between  
8 single- and double-species biofilms was calculated using unpaired *t*-test (data distribution was  
9 confirmed to be normal).



11

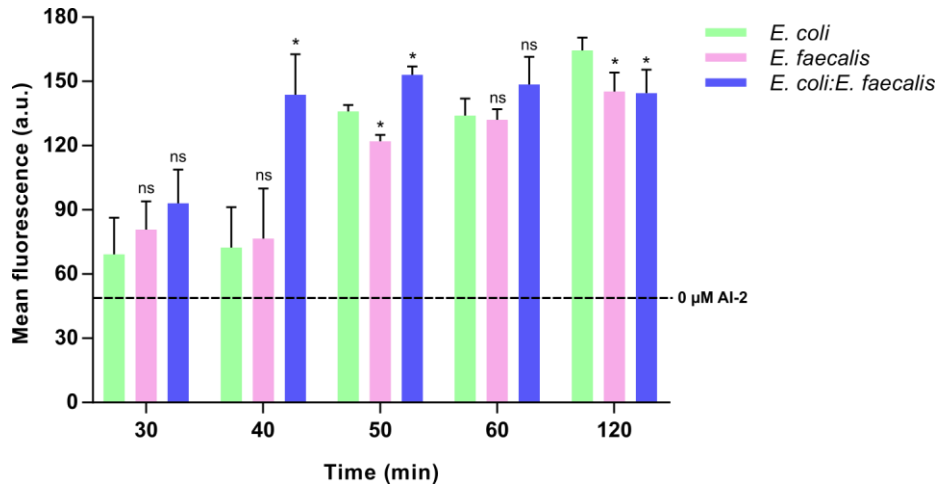

12

13

14 **Figure S2.** Extracellular AI-2 levels in *E. coli*, *E. faecalis* and *E. coli:E. faecalis* cultures as  
15 assessed by *Plsr-gfp* activity of the biosensor defective in AI-2 production (see Materials and  
16 Methods). Dashed line represents *Plsr-gfp* activity in absence of AI-2. Means of three  
17 independent replicates are shown; error bars represent standard deviation. *P* values were  
18 calculated using Mann-Whitney test (\**P*<0.05).

19

20

21

22

A

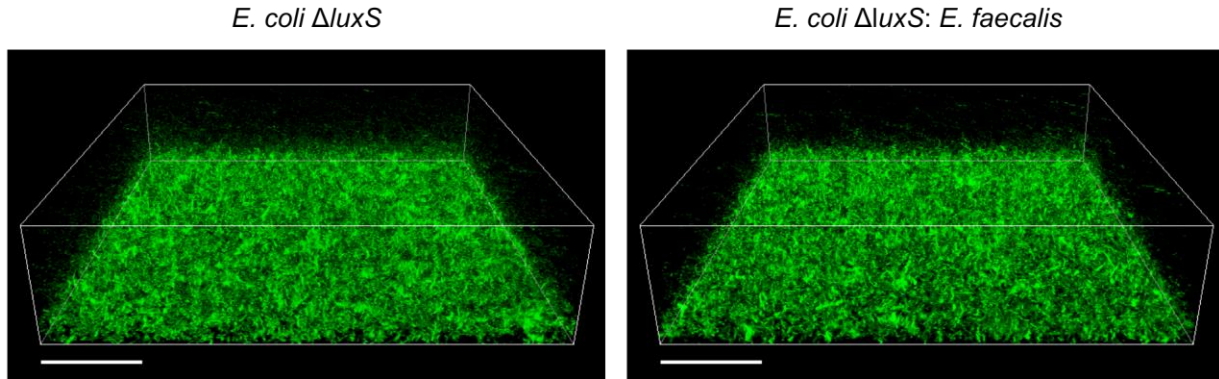

B

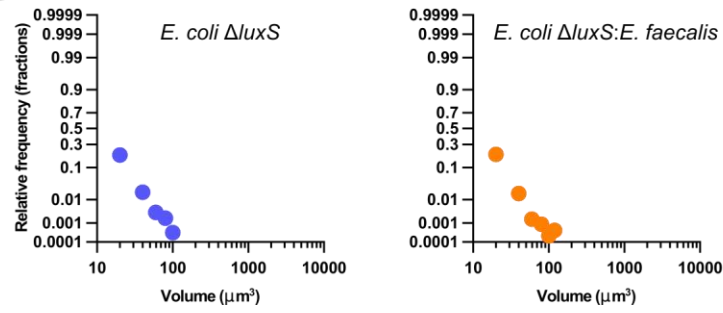

23

24 **Figure S3. The *E. coli*:*E. faecalis* co-aggregation requires AI-2 production.** Confocal laser

25 scanning microscopy of static *E. coli ΔluxS* (expressing GFP) biofilms grown alone or in

26 presence of unlabeled *E. faecalis* (initial inoculation ratio 1:1). Scale bars, 40  $\mu\text{m}$ . **(B)**

27 Distribution of microcolony volumes in static single- and double-species biofilms of *E. coli*. *P*

28 value for the difference between single- and double-species biofilms calculated using unpaired *t*-

29 test was 0.55 (data distribution was confirmed to be normal).

30

31

32

33

34

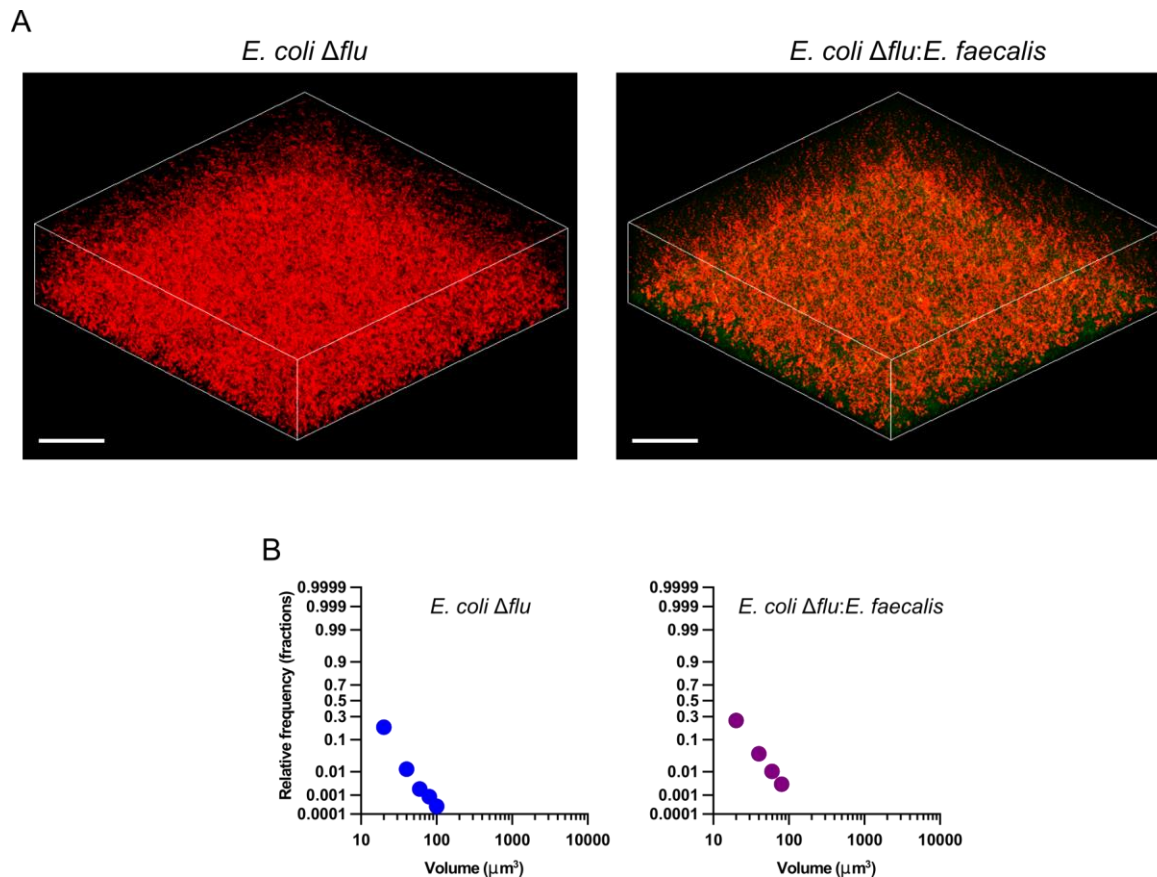

36

37

38 **Figure S4. The *E. coli*:*E. faecalis* co-aggregation requires Ag43.** Confocal laser scanning

39 microscopy of static *E. coli Δflu* (expressing mCherry) biofilms grown alone or in presence of *E.*

40 *faecalis* (expressing GFP, initial inoculation ratio 1:1). Scale bars, 40 μm. **(B)** Distribution of

41 microcolony volumes in static single- and double-species biofilms of *E. coli*. *P* value for the

42 difference between single- and double-species biofilms calculated using unpaired *t*-test was

43 0.001 (data distribution was confirmed to be normal).

44

45

46

47

48

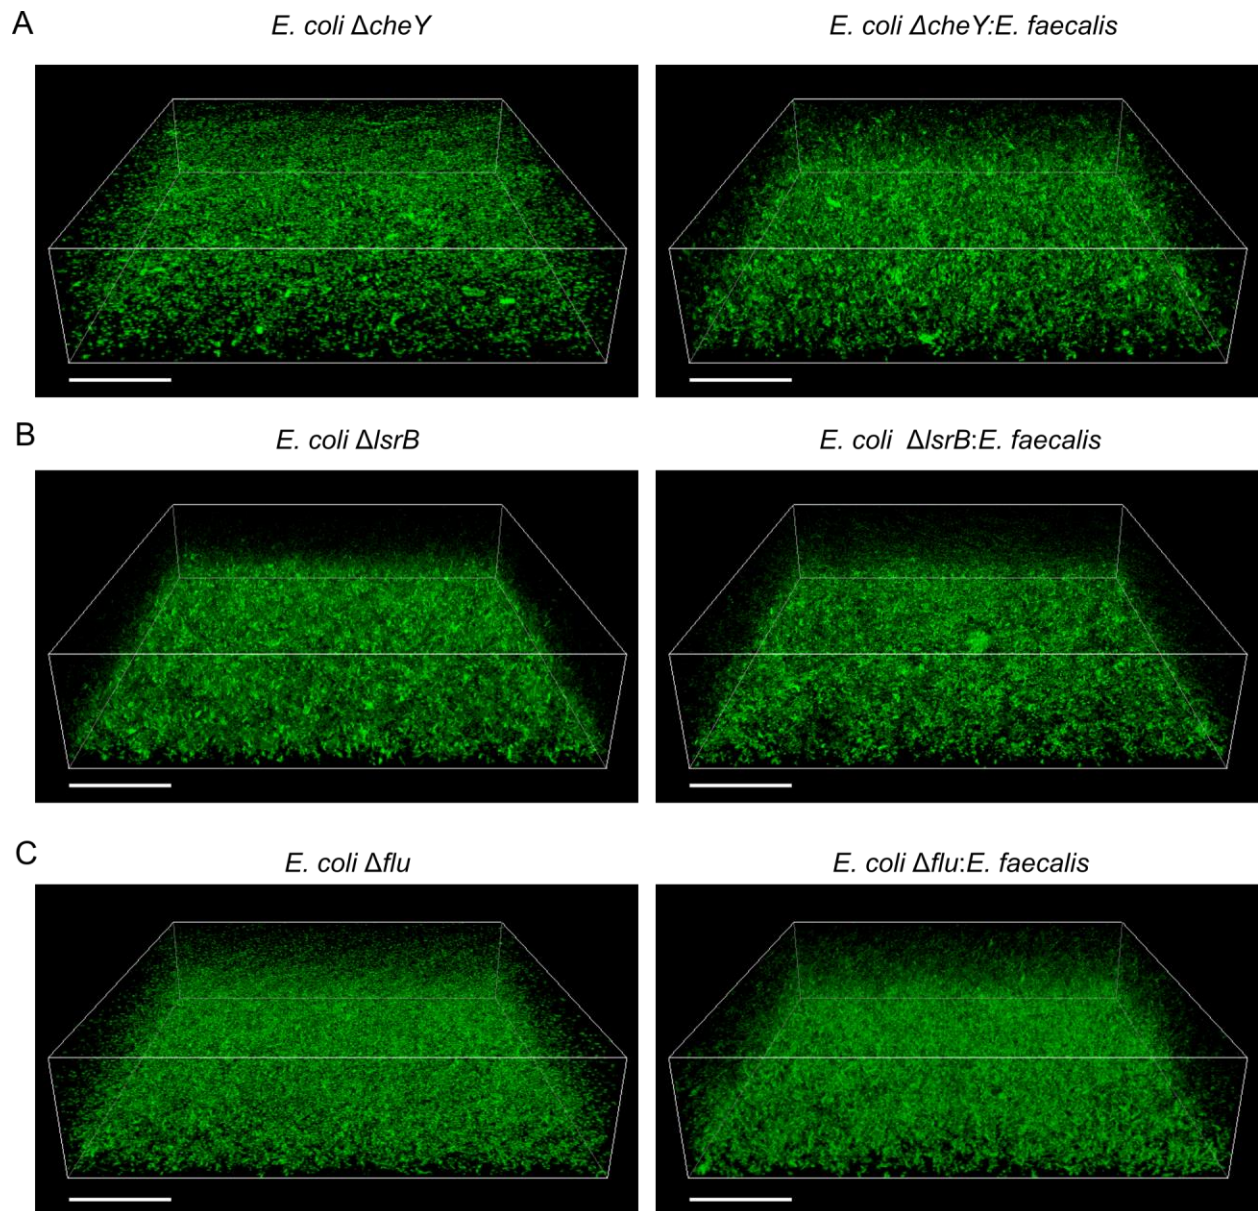

49

50

51 **Figure S5. Static biofilms of *E. coli* in single- or dual-species culture.** Confocal laser scanning

52 microscopy of static *E. coli* (GFP<sup>+</sup>) biofilms grown in monoculture (left panel) or mixed with *E.*

53 *faecalis* (right panel). Inoculation ratio was 1:1. Scale bars, 40  $\mu$ m.

54

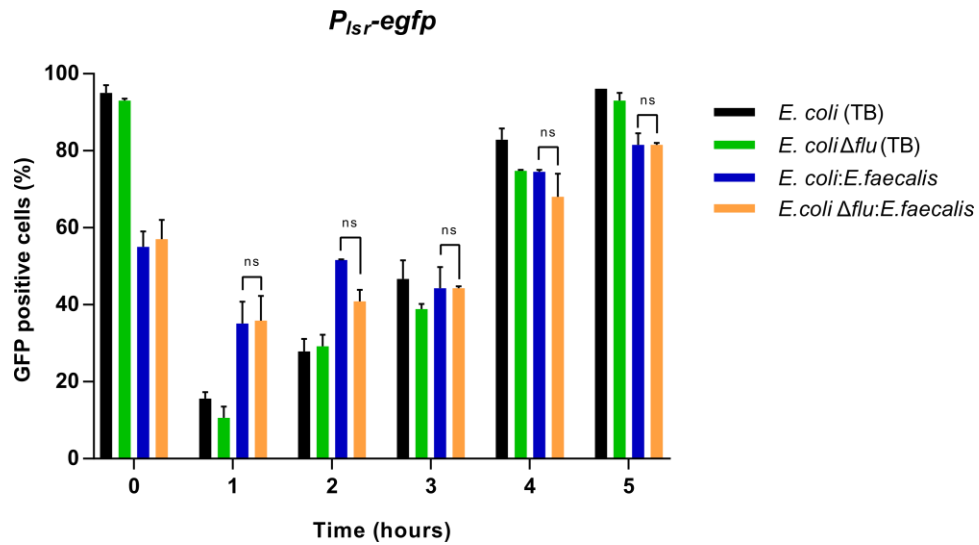

55

56 **Figure S6. The effect of *E. faecalis* on induction of *l<sub>sr</sub>* operon in *E. coli* cells is contact-**  
57 **independent.** The bars represent percentage of GFP<sup>+</sup> (induced) cells in each population. Note  
58 that the lower initial fraction of GFP<sup>+</sup> cells in mixed culture is because *E. coli* initially  
59 constitutes only 50% of the total population. Means of four independent replicates are shown;  
60 error bars indicate standard deviation. *P* values for the difference from *E. coli* culture grown in  
61 TB were calculated using Mann-Whitney test (ns – not significant).

62

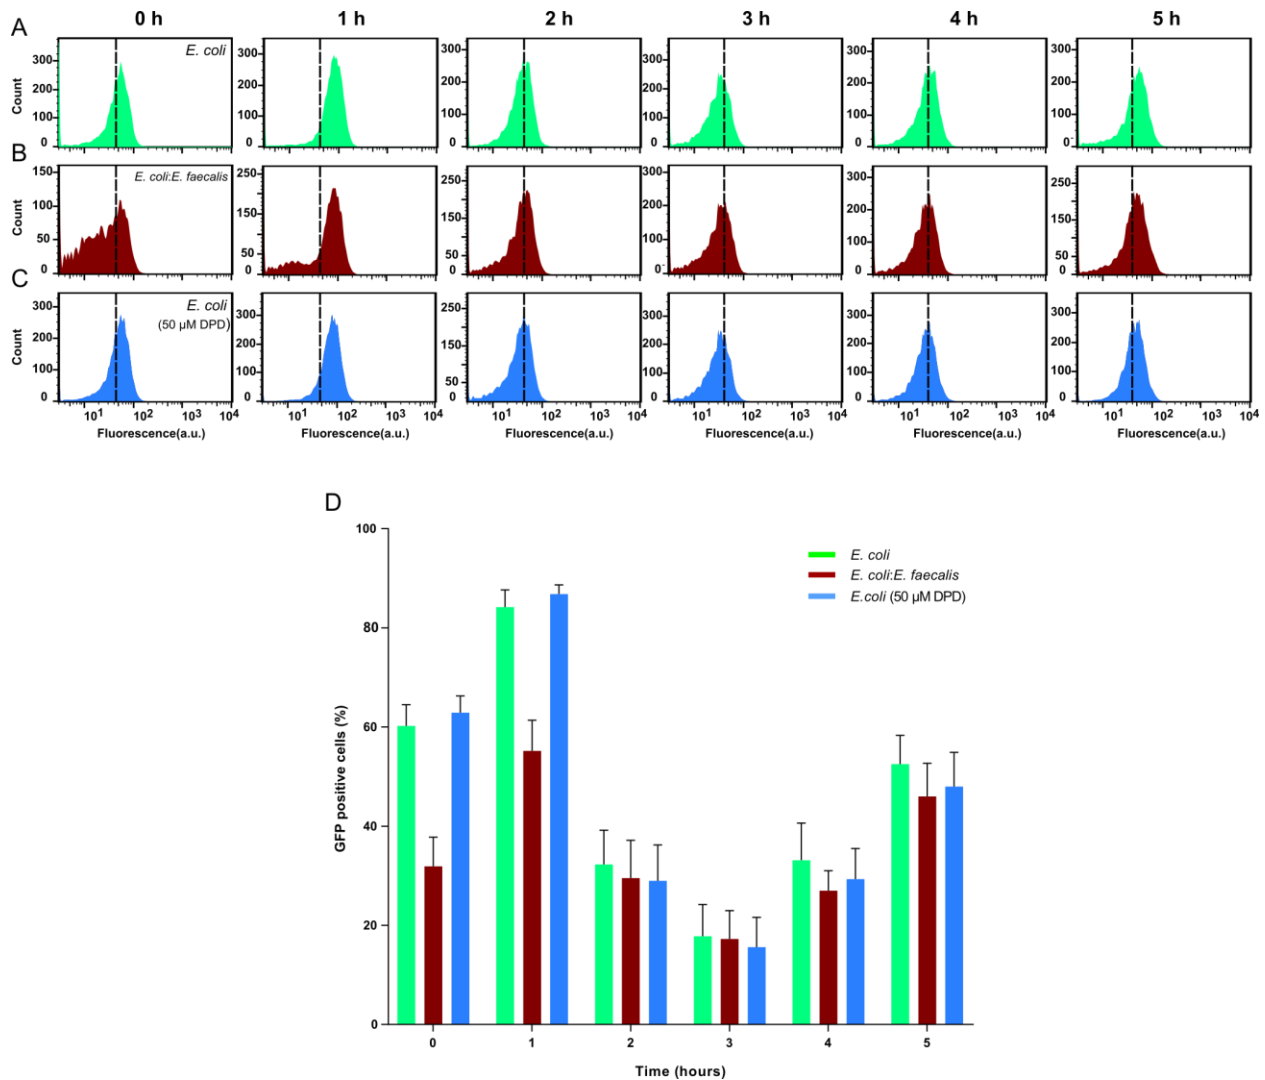64  
65

66 **Figure S7. No effect of *E. faecalis* or exogenous DPD/AI-2 on *E. coli luxS* promoter.** Activity  
 67 of the *luxS* promoter was measured using flow cytometry. (A-C) *E. coli* cells carrying *PluxS-gfp*  
 68 reporter plasmid pLeoL8 were grown in TB alone (A) or with *E. faecalis* at 1:1 ratio (B), or in  
 69 TB supplemented with 50 μM synthetic DPD/AI-2 (C). Dashed line distinguishes GFP<sup>+</sup> (induced  
 70 *E. coli*) and GFP<sup>-</sup> (uninduced *E. coli* as well as unlabeled *E. faecalis* in B) subpopulations. Note  
 71 that since *E. coli* comprises only 50% of population at 0 h in (B), its peak appears lower than that  
 72 of *E. coli* grown alone. (D) The bars represent percentage of GFP<sup>+</sup> (induced) cells in each



73 population. Means of at least six independent replicates are shown; error bars indicate standard  
74 deviation.

75

76

77

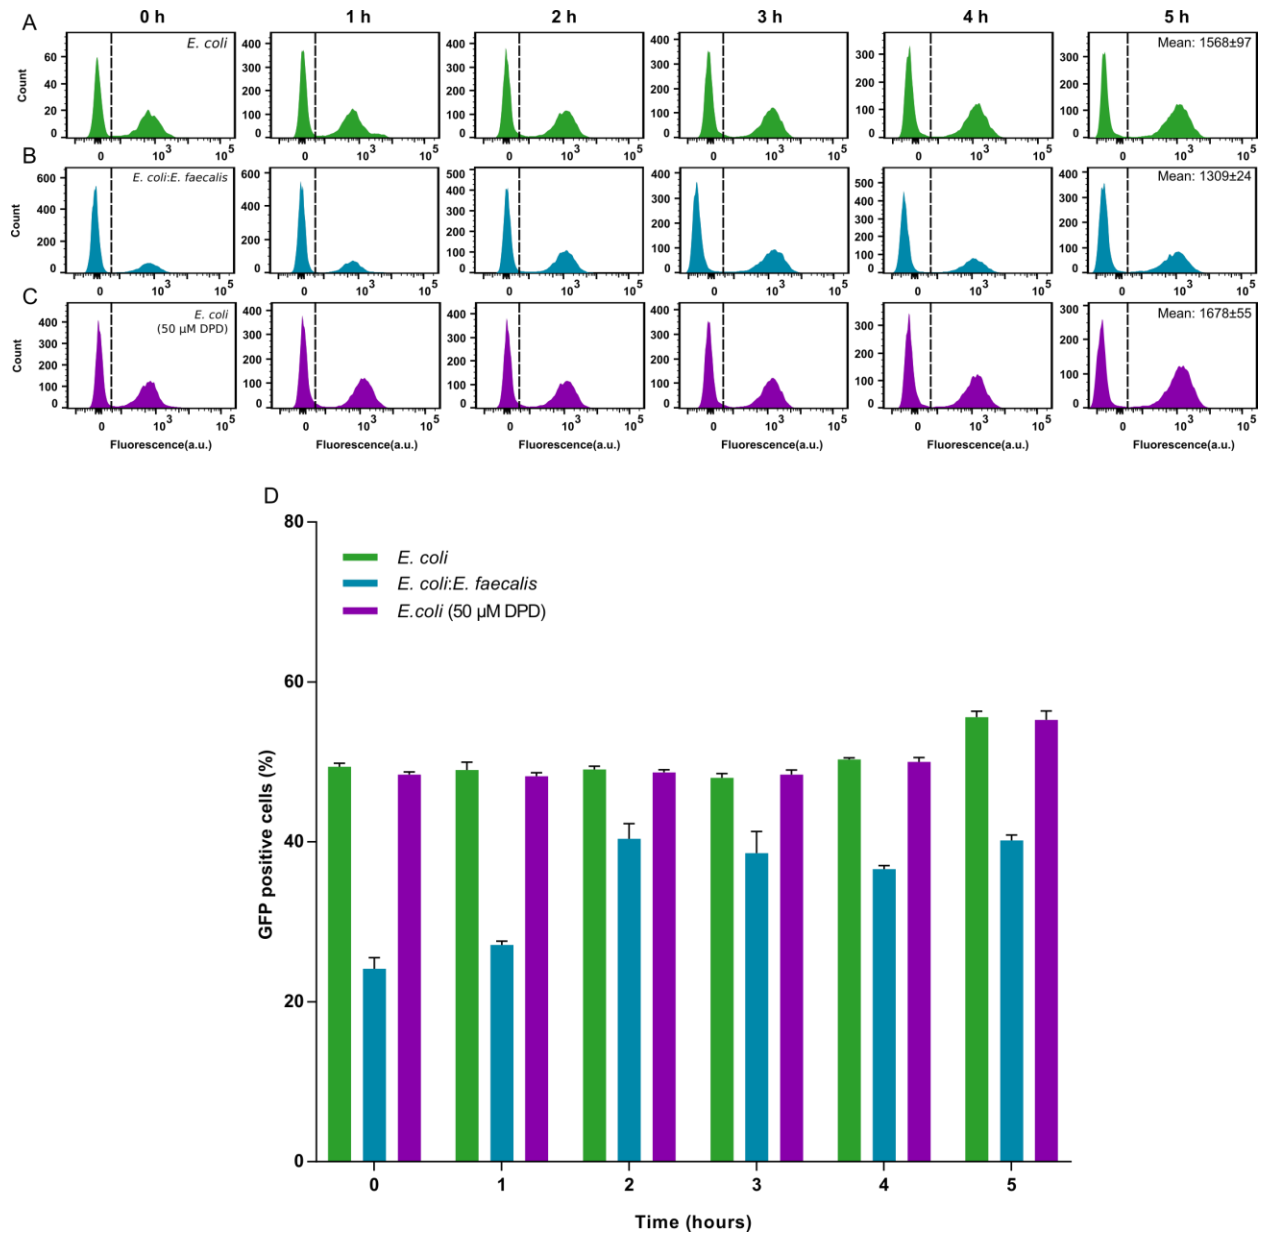

79

80

81 **Figure S8. No effect of *E. faecalis* or exogenous DPD/AI-2 on *E. coli agn43* expression.**82 Activity of the *agn43* (*flu*) promoter was measured using flow cytometry. (A-C) *E. coli* LeoL19483 cells carrying *agn43* reporter construct were grown in TB alone (A) or with *E. faecalis* at 1:1

84 ratio (B), or in TB supplemented with 50 μM synthetic DPD/AI-2 (C). Dashed line distinguishes

85 GFP<sup>+</sup> (induced *E. coli*) and GFP<sup>-</sup> (uninduced *E. coli* as well as unlabeled *E. faecalis* in B)  
86 subpopulations. Note that since *E. coli* comprises only 50% of population at 0 h in (B), its peak  
87 appears lower than that of *E. coli* grown alone. **(D)** The bars represent percentage of GFP<sup>+</sup>  
88 (induced) cells in each population. Means of at least four independent replicates are shown; error  
89 bars indicate standard deviation.

90

91

92

93

94

95
